# Supplementary material
Source: publisher figshare collection journal article supplement (https://karger.figshare.com/articles/dataset/_/5129548)
Supplement: Supplementary file 1 [file 1 › 000444282_sm_Suppl._Material.docx]

**SUPPLEMENTARY MATERIAL**

**Cognitive impairment in transient ischemic attack patients: a systematic review**

Frank G van Rooij, MD1; Roy PC Kessels, PhD2; Edo Richard, MD, PhD1; Frank-Erik de Leeuw, MD, PhD1; Ewoud J van Dijk, MD, PhD1

Radboud university medical center, Donders Institute for Brain, Cognition and Behaviour, Centre for Neuroscience, Departments of 1Neurology and 2Medical Psychology, Nijmegen, The Netherlands

**Corresponding author:**

Dr Ewoud van Dijk

Radboud university medical center

Department of Neurology (HP 935)

PO Box 9101

6500 HB Nijmegen, The Netherlands

Tel: +31 24 361 66 00

Fax: +31 24 354 11 22

Email: [ewoud.vandijk@radboudumc.nl](mailto:ewoud.vandijk@radboudumc.nl)

**Supplementary Methods**

***PRISMA checklist***

| **Section/topic** | **#** | **Checklist item** | **Reported on page #** |
| --- | --- | --- | --- |
| **TITLE** | | |  |
| Title | 1 | Identify the report as a systematic review, meta-analysis, or both. | 1 |
| **ABSTRACT** | | |  |
| Structured summary | 2 | Provide a structured summary including, as applicable: background; objectives; data sources; study eligibility criteria, participants, and interventions; study appraisal and synthesis methods; results; limitations; conclusions and implications of key findings; systematic review registration number. | 2 |
| **INTRODUCTION** | | |  |
| Rationale | 3 | Describe the rationale for the review in the context of what is already known. | 3 |
| Objectives | 4 | Provide an explicit statement of questions being addressed with reference to participants, interventions, comparisons, outcomes, and study design (PICOS). | 3 |
| **METHODS** | | |  |
| Protocol and registration | 5 | Indicate if a review protocol exists, if and where it can be accessed (e.g., Web address), and, if available, provide registration information including registration number. | N/A |
| Eligibility criteria | 6 | Specify study characteristics (e.g., PICOS, length of follow-up) and report characteristics (e.g., years considered, language, publication status) used as criteria for eligibility, giving rationale. | 4 |
| Information sources | 7 | Describe all information sources (e.g., databases with dates of coverage, contact with study authors to identify additional studies) in the search and date last searched. | 4 |
| Search | 8 | Present full electronic search strategy for at least one database, including any limits used, such that it could be repeated. | Supplemental material |
| Study selection | 9 | State the process for selecting studies (i.e., screening, eligibility, included in systematic review, and, if applicable, included in the meta-analysis). | 4 |
| Data collection process | 10 | Describe method of data extraction from reports (e.g., piloted forms, independently, in duplicate) and any processes for obtaining and confirming data from investigators. | 5 |
| Data items | 11 | List and define all variables for which data were sought (e.g., PICOS, funding sources) and any assumptions and simplifications made. | 5 |
| Risk of bias in individual studies | 12 | Describe methods used for assessing risk of bias of individual studies (including specification of whether this was done at the study or outcome level), and how this information is to be used in any data synthesis. | Supplemental material, 4-5 |
| Summary measures | 13 | State the principal summary measures (e.g., risk ratio, difference in means). | 5 |
| Synthesis of results | 14 | Describe the methods of handling data and combining results of studies, if done, including measures of consistency (e.g., I2) for each meta-analysis. | 5 |
| Risk of bias across studies | 15 | Specify any assessment of risk of bias that may affect the cumulative evidence (e.g., publication bias, selective reporting within studies). | Supplemental material, 4-5 |
| Additional analyses | 16 | Describe methods of additional analyses (e.g., sensitivity or subgroup analyses, meta-regression), if done, indicating which were pre-specified. | N/A |
| **RESULTS** | | |  |
| Study selection | 17 | Give numbers of studies screened, assessed for eligibility, and included in the review, with reasons for exclusions at each stage, ideally with a flow diagram. | 6, Figure 1 |
| Study characteristics | 18 | For each study, present characteristics for which data were extracted (e.g., study size, PICOS, follow-up period) and provide the citations. | 6-7, Tables 1, S1 |
| Risk of bias within studies | 19 | Present data on risk of bias of each study and, if available, any outcome level assessment (see item 12). | 6-7, Figure 2, Table S2 |
| Results of individual studies | 20 | For all outcomes considered (benefits or harms), present, for each study: (a) simple summary data for each intervention group (b) effect estimates and confidence intervals, ideally with a forest plot. | Table 1 |
| Synthesis of results | 21 | Present results of each meta-analysis done, including confidence intervals and measures of consistency. | N/A |
| Risk of bias across studies | 22 | Present results of any assessment of risk of bias across studies (see Item 15). | 6-7, Figure 1 |
| Additional analysis | 23 | Give results of additional analyses, if done (e.g., sensitivity or subgroup analyses, meta-regression [see Item 16]). | N/A |
| **DISCUSSION** | | |  |
| Summary of evidence | 24 | Summarize the main findings including the strength of evidence for each main outcome; consider their relevance to key groups (e.g., healthcare providers, users, and policy makers). | 10 |
| Limitations | 25 | Discuss limitations at study and outcome level (e.g., risk of bias), and at review-level (e.g., incomplete retrieval of identified research, reporting bias). | 10-11 |
| Conclusions | 26 | Provide a general interpretation of the results in the context of other evidence, and implications for future research. | 11-13 |
| **FUNDING** | | |  |
| Funding | 27 | Describe sources of funding for the systematic review and other support (e.g., supply of data); role of funders for the systematic review. | 15 |

***Search strategies***

Medline:

1. Combination of medical subject headings:

("Ischemic Attack, Transient"[Mesh]) AND ((((("Cognition"[Mesh]) OR "Cognition Disorders"[Mesh]) OR "Dementia"[Mesh]) OR "Dementia, Multi-Infarct"[Mesh]) OR "Dementia, Vascular"[Mesh])

1. Combination of free search terms:

(cogniti* OR dementia) AND (TIA OR (transient ischemic) OR (transient ischemic) OR (transient symptoms) OR transient)

Embase:

1. Combination of medical subject headings:
   1. cognition/
   2. cognitive defect/
   3. dementia/
   4. multiinfarct dementia/
   5. transient ischemic attack/
   6. 1 or 2 or 3 or 4
   7. 5 and 6
2. Combination of free search terms:
   1. (cogniti* or dementia).af.
   2. limit 1 to (human and English language)
   3. (tia or transient ischemic or transient ischemic or transient symptoms or transient).af.
   4. limit 3 to (human and English language)
   5. 2 and 4

***Adapted RTI item bank for assessing risk of bias and confounding*** [1,2]

**Q1. Are inclusion and exclusion criteria applied uniformly?**

*Consider patients vs. controls if applicable, otherwise individual patients.*

**Q2. Is the recruitment strategy the same across individuals or study groups?**

*Consider patients vs. controls if applicable, otherwise individual patients.*

**Q3. Is the selection of the comparison group adequate?**

*Only applicable if control group present.*

*Consider hospital vs. population based*

**Q5. Is the outcome assessor blinded to exposure status?**

*Assessor of cognitive function blinded for clinical status (TIA or not)?*

**Q6. Are valid and reliable measures implemented?**

*Reliable and conventional ascertainment of TIA?*

*Reliable and conventional ascertainment of dementia, prior stroke status, cardiovascular risk factors, depression?*

**Q7. Is the length of follow-up the same across individuals or study groups?**

*Delay from TIA to cognitive testing uniform for all individuals or study groups?*

**Q8. Is the impact of loss to follow-up assessed?**

*Only applicable if follow-up study.*

**Q9. Are important primary outcomes reported?**

*Cognitive impairment*

*Timing of cognitive testing*

**Q11. Are the results believable?**

**Q12. Has an attempt been made to balance to allocation between groups or to match groups?**

*Only applicable if control group present.*

**Q13. Are important confounding variables taken into account in the design and/or analysis?**

*Stratified by level of importance:*

1. *Age, level of education, prior stroke, pre-existing dementia.*
2. *Vascular risk factors, vascular brain damage, concurrent neuropsychiatric disturbances.*

Q4 and Q10 of the RTI item bank not relevant to the included studies.

**Supplementary Figure legend**

**Figure S1. Risk of bias by item in all studies (n=13) using an adaptation of the RTI item bank.** Numbers and percentages represent the studies with low risk of bias (green), unclear risk of bias (yellow), or high risk of bias (red) over the number of studies for which the item was applicable. Due to limited space, not all numbers were included.

**Supplementary Tables**

| **Supplementary Table S1.** Additional characteristics of studies reporting the prevalence of post-TIA cognitive impairment. | | | | | | |
| --- | --- | --- | --- | --- | --- | --- |
| **Reference** | **Study design and relevant inclusion criteria** | **Relevant exclusion criteria** | **Female** | **Cardiovascular risk factors** | **Mode of cognitive assessment** | **Cognitive domains tested and individual tests performed (only applicable if NPS)** |
| Sörös et al., 2015 [3] | H, X; | Prior stroke or dementia; aphasia; alcohol or drug abuse; no follow-up | 61% | ∙∙ | NPS, MMSE | Executive function (TMT, NCSE-judgment, clock drawing) |
| van Rooij et al., 2014 [4] | H, X;  45-65 years | Prior stroke or dementia; incident stroke or CEA between TIA and cognitive testing; MMSE <24 | 63% | HT 49%, HC 29%, DM 5%, smoking 18% | NPS | Executive function (verbal fluency, Stroop interference), processing speed (Stroop task 1+2, SDMT), working memory (PPMST), attention (VSAT), episodic memory (CVLT) |
| Narasimhalu et al., 2011 [5] | H, C;  ESPRIT;  TIA <6 months | Cardiac embolism; CEA; moderate/severe leukoaraiosis; confusion; severe aphasia; major psychosis | 32%* | ∙∙ | NPS | Attention (digit span, visual span, auditory detection), language (Boston naming, category fluency), visuomotor speed (SDMT, digit cancellation, maze), visuoconstruction (WAIS-R block design subtest), verbal memory (word list and story recall), visual memory (picture recall, WMS-R visual reproduction) |
| Hoffmann et al., 2009 [6] | H, C;  18-90 years | Dementia or other neurodegenerative disease; moderate/severe depression; inability to complete tests; <8 years education | ∙∙ | ∙∙ | NPS | Language, memory, executive function, visuospatial (COCONUTS) |
| Pendlebury et al., 2013 [7] | P, C;  OXVASC;  Barthel >19 | Dysphasia; illness; poor English | 45% | ∙∙ | NPS | Executive/activation function (TMT, verbal fluency, SDMT), language (Boston naming, verbal fluency), visuospatial (Rey-Osterrieth complex figure), episodic memory (HVLT-R) |
| Bakker et al., 2003 [8] | H, C;  Symptomatic ICA occlusion;  Prior stroke 33% | Prior stroke <6 months before cognitive testing; mRS >3 | 18% | HT 56%; HC 92; DM 21%; smoking 64% | NPS | General intelligence (SPM, WAIS-R vocabulary subtest), memory (WMS, CVLT, VRT), executive function (TMT, MCST, word production by lexical rules), reaction speed (Vienna), motor speed (Tapping task) |
| Dong et al., 2012 [9] | H, C;  >20 years | Significant aphasia or dysarthria; major active psychiatric illness; pre-existing dementia; IQCODE >3.38; acute delirium; mRS >4 | 32%* | ∙∙ | NPS | Attention (digit span, visual span, auditory detection), language (Boston naming, category fluency), visuomotor speed (SDMT, digit cancellation, maze), visuoconstruction (WMS-R visual reproduction, copy task, clock drawing, WAIS-R block design subtest), executive function (FAB), verbal memory (word list and story recall), visual memory (picture recall, WMS-R visual reproduction) |
| Kjörk et al., 2015 [10] | H, C; | Dementia; aphasia; insufficient Swedish | 50% | Prior stroke 18%, prior TIA 9%, DM 9% | MoCA |  |
| Pendlebury et al., 2012 [11] | P, C;  OXVASC;  MMSE ≥24 | Dysphasia; illness; poor English | 49% | ∙∙ | MMSE, MoCA |  |
| Volonghi et al., 2013 [12] | P, C;  OXVASC;  First-ever TIA | Prior stroke; any recurrent ischemic event during follow-up | 55% | HT 51%, HC 38%, DM 12%, AF 18%, smoking 11% | MMSE, MoCA, TICSm |  |
| Pendlebury et al., 2011 [13] | P, C;  OXVASC;  >24 h after TIA | Recurrent TIA or stroke <1 month after baseline; dementia; dysphasia or dysarthria; poor English | 53%* | ∙∙ | MMSE, MoCA |  |
| Guyomard et al., 2011 [14] | H, CC;  ≥45 years;  First-ever TIA | Prior cognitive impairment or depression | 41% | HT 56%; HC 37%; DM 57%; AF 15%; smoking 74% | MoCA |  |
| Blackburn et al., 2013 [15] | H, CS;  >18 years | Major physical disability; significant aphasia or dysarthria; major active psychiatric disorder | 38% | ∙∙ | MMSE, MoCA |  |

*mean of TIA and stroke patients combined.

∙∙ indicates no data available; AF, atrial fibrillation; C, cohort study; CC, case control study; CEA, carotid endarterectomy; COCONUTS, Comprehensive Cognitive Neurological Test [16]; CS, case-series; CVLT, California Verbal Learning Test; DM, diabetes mellitus; ESPRIT, European Australasian Stroke Prevention in Reversible Ischemia Trial [17]; FAB, frontal assessment battery; H, hospital-based; HC, hypercholesterolemia; HT, hypertension; HVLT-R, Hopkins Verbal Learning Test-Revised; IQCODE, Informant Questionnaire on Cognitive Decline in the Elderly; MCST, Modified Card Sorting Test; MMSE, Mini-Mental State Examination; MoCA, Montreal Cognitive Assessment; mRS, modified Rankin score; NCSE, Neurobehavioral Cognitive Status Examination; OXVASC, Oxford Vascular Study [18,19]; P, population-based; PPMST, Paper and Pencil Memory Scanning Test; SDMT, Symbol-Digit Modalities Test; SPM, Standard Progressive Matrices; TICSm, modified Telephone Interview for Cognitive Status; TMT, Trail Making Test; VRT, Visual Retention Test; VSAT, Verbal Series Attention Test; WAIS-R, Wechsler Adult Intelligence Scale-Revised; WMS-R, Wechsler Memory Scale-Revised; X, cross-sectional study.

| **Supplementary Table S2.** Risk of bias assessment derived from adapted RTI item bank. | | | | | | | | | | | |
| --- | --- | --- | --- | --- | --- | --- | --- | --- | --- | --- | --- |
| **Study** | **Q1** | **Q2** | **Q3** | **Q5** | **Q6** | **Q7** | **Q8** | **Q9** | **Q11** | **Q12** | **Q13** |
| Sörös et al.  (2015) [3] | Low | Low | N/A | Unclear | Low | N/A | Unclear | Low | Low | N/A | High |
| Kjörk et al.  (2015) [10] | Low | Low | N/A | High | Low | N/A | High | Low | Low | N/A | High |
| Van Rooij et al.  (2014) [4] | Low | Low | Low | Low | Low | N/A | Unclear | Low | Low | Low | Low |
| Volonghi et al. (2013) [12] | Low | Low | Low | Unclear | Low | Low | Low | Low | Low | Low | Unclear |
| Pendlebury et al. (2013)[7] | Low | Low | Low | Unclear | Low | Low | Unclear | Low | Low | Low | Unclear |
| Dong et al. (2012) [9] | Low | Low | N/A | Low | Low | High | Low | High | Low | N/A | Unclear |
| Pendlebury et al. (2012) [11] | Unclear | Unclear | Low | Unclear | Low | High | Unclear | Unclear | Low | Low | Unclear |
| Blackburn et al. (2013) [15] | Low | Unclear | N/A | Unclear | Unclear | N/A | N/A | Low | Low | N/A | High |
| Pendlebury et al. (2011) [13] | Low | Low | N/A | Unclear | Low | High | Low | High | Low | N/A | High |
| Narasimhalu et al. (2011) [5] | Low | Low | N/A | High | Low | High | Low | High | Low | N/A | High |
| Guyomard et al. (2011) [14] | Low | Low | Low | Unclear | Low | N/A | N/A | Low | Low | High | High |
| Hoffmann et al. (2009) [6] | Low | Low | N/A | Unclear | Low | Low | N/A | Low | Low | N/A | High |
| Bakker et al. (2003) [8] | Low | Low | Low | Unclear | Low | N/A | N/A | Unclear | Low | Low | Low |

N/A indicates not applicable.

**References**

1 Viswanathan M, Berkman ND: Development of the RTI item bank on risk of bias and precision of observational studies. J Clin Epidemiol 2012;65:163-178.

2 Viswanathan M, Berkman ND, Dryden DM, Hartling L: Assessing risk of bias and confounding in observational studies of interventions or exposures: Further development of the RTI item bank. Rockville (MD), Agency for Healthcare Research and Quality (US), 2013.

3 Sörös P, Harnadek M, Blake T, Hachinski V, Chan R: Executive dysfunction in patients with transient ischemic attack and minor stroke. J Neurol Sci 2015;354:17-20.

4 van Rooij FG, Schaapsmeerders P, Maaijwee NA, van Duijnhoven DA, de Leeuw FE, Kessels RP, van Dijk EJ: Persistent cognitive impairment after transient ischemic attack. Stroke 2014;45:2270-2274.

5 Narasimhalu K, Ang S, De Silva DA, Wong MC, Chang HM, Chia KS, Auchus AP, Chen CP: The prognostic effects of poststroke cognitive impairment no dementia and domain-specific cognitive impairments in nondisabled ischemic stroke patients. Stroke 2011;42:883-888.

6 Hoffmann M, Schmitt F, Bromley E: Vascular cognitive syndromes: Relation to stroke etiology and topography. Acta Neurol Scand 2009;120:161-169.

7 Pendlebury ST, Mariz J, Bull L, Mehta Z, Rothwell PM: Impact of different operational definitions on mild cognitive impairment rate and MMSE and MoCA performance in transient ischaemic attack and stroke. Cerebrovasc Dis 2013;36:355-362.

8 Bakker FC, Klijn CJ, Jennekens-Schinkel A, van der Tweel I, Tulleken CA, Kappelle LJ: Cognitive impairment in patients with carotid artery occlusion and ipsilateral transient ischemic attacks. J Neurol 2003;250:1340-1347.

9 Dong Y, Venketasubramanian N, Chan BP, Sharma VK, Slavin MJ, Collinson SL, Sachdev P, Chan YH, Chen CL: Brief screening tests during acute admission in patients with mild stroke are predictive of vascular cognitive impairment 3-6 months after stroke. J Neurol Neurosurg Psychiatry 2012;83:580-585.

10 Kjörk E, Blomstrand C, Carlsson G, Lundgren-Nilsson A, Gustafsson C: Daily life consequences, cognitive impairment, and fatigue after transient ischemic attack. Acta Neurol Scand DOI: 10.1111/ane.12435.

11 Pendlebury ST, Markwick A, de Jager CA, Zamboni G, Wilcock GK, Rothwell PM: Differences in cognitive profile between tia, stroke and elderly memory research subjects: A comparison of the MMSE and MoCA. Cerebrovasc Dis 2012;34:48-54.

12 Volonghi I, Pendlebury ST, Welch SJ, Mehta Z, Rothwell PM: Cognitive outcomes after acute coronary syndrome: A population based comparison with transient ischaemic attack and minor stroke. Heart 2013;99:1509-1514.

13 Pendlebury ST, Wadling S, Silver LE, Mehta Z, Rothwell PM: Transient cognitive impairment in TIA and minor stroke. Stroke 2011;42:3116-3121.

14 Guyomard V, Metcalf AK, Naguib MF, Fulcher RA, Potter JF, Myint PK: Transient ischaemic attack, vascular risk factors and cognitive impairment: A case-controlled study. Age Ageing 2011;40:641-644.

15 Blackburn DJ, Bafadhel L, Randall M, Harkness KA: Cognitive screening in the acute stroke setting. Age Ageing 2013;42:113-116.

16 Hoffmann M, Schmitt F, Bromley E: Comprehensive cognitive neurological assessment in stroke. Acta Neurol Scand 2009;119:162-171.

17 De Schryver EL: Design of ESPRIT: An international randomized trial for secondary prevention after non-disabling cerebral ischaemia of arterial origin. European/australian Stroke Prevention in Reversible Ischaemia Trial (ESPRIT) group. Cerebrovasc Dis 2000;10:147-150.

18 Rothwell PM, Coull AJ, Giles MF, Howard SC, Silver LE, Bull LM, Gutnikov SA, Edwards P, Mant D, Sackley CM, Farmer A, Sandercock PA, Dennis MS, Warlow CP, Bamford JM, Anslow P, Oxford Vascular S: Change in stroke incidence, mortality, case-fatality, severity, and risk factors in Oxfordshire, UK from 1981 to 2004 (Oxford Vascular Study). Lancet 2004;363:1925-1933.

19 Rothwell PM, Coull AJ, Silver LE, Fairhead JF, Giles MF, Lovelock CE, Redgrave JN, Bull LM, Welch SJ, Cuthbertson FC, Binney LE, Gutnikov SA, Anslow P, Banning AP, Mant D, Mehta Z, Oxford Vascular S: Population-based study of event-rate, incidence, case fatality, and mortality for all acute vascular events in all arterial territories (Oxford Vascular Study). Lancet 2005;366:1773-1783.
