# Supplementary material
Source: publisher figshare collection journal article supplement (https://karger.figshare.com/articles/dataset/_/5129548)

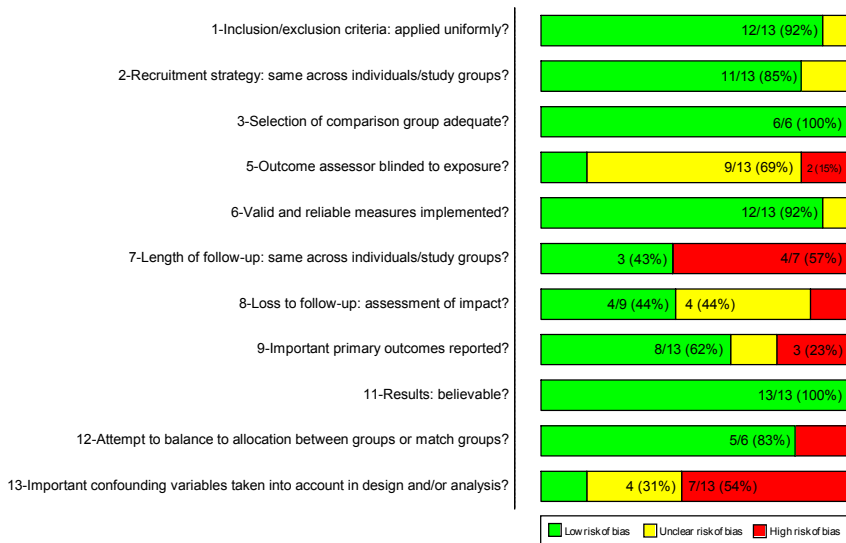

Supplement: Supplementary file 1 [file 1 › 000444282_sm_Figure.pdf]
